# Supplementary material for: Interfacial modification of NaCoO 2 positive electrodes with inorganic oxides by simple mixing and the effects on all-solid-state Na batteries
Source: Royal Society of Chemistry journal article supplement (doi:10.1039/d4ra02957g), 2024-01-01
Supplement: d4ra02957g1.pdf [file d4ra02957g1.pdf]

**Electric Supplementary Information**

**Interfacial Modification of NaCoO<sub>2</sub> Positive Electrodes with Inorganic Oxides by Simple Mixing and the Effects on All-Solid-State Na Batteries**

Takaaki Ichikawa, Koji Hiraoka and Shiro Seki\*

*Graduate School of Applied Chemistry and Chemical Engineering, Kogakuin University, 2665-1 Nakano-machi, Hachioji-shi, Tokyo 192-0015, Japan.*

---

\* Corresponding author. Tel: +81-42-628-4568; fax: +81-42-628-4568.

E-mail: shiro-seki@cc.kogakuin.ac.jp (S. Seki)

## Preparation of Positive electrode sheets

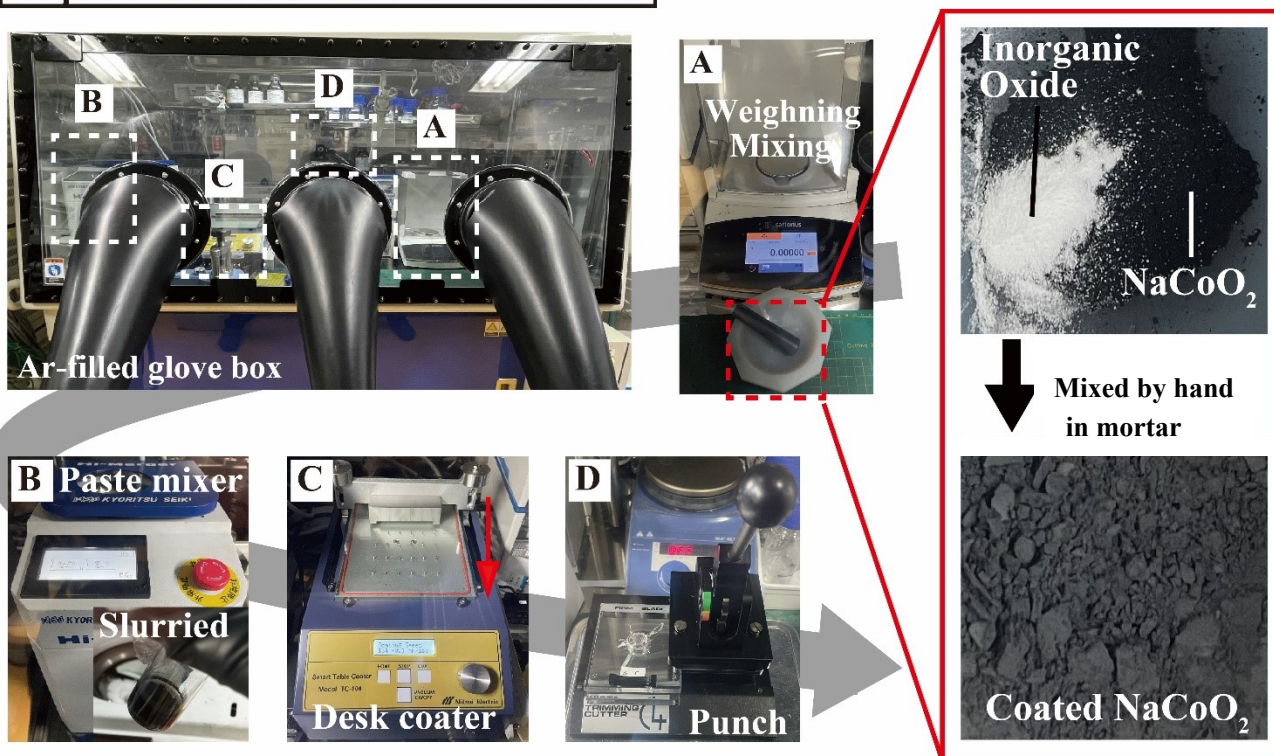

**Figure S-1.** Preparation scheme of inorganic oxide-coated positive electrode sheets for all-solid-state Na polymer batteries.

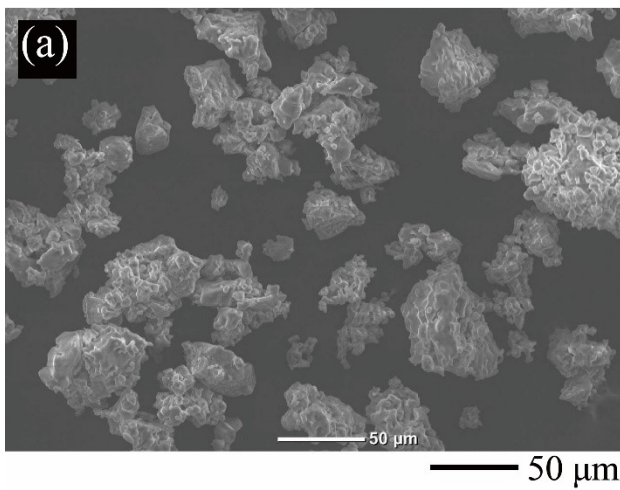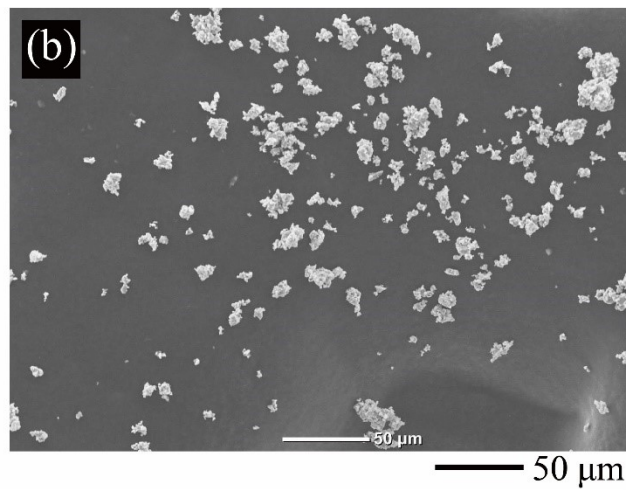

**Figure S-2.** SEM images of  $\text{Na}_3\text{PO}_4$  powder (a) and NZSP- powder (b) before mixing, respectively.
